# Supplementary material for: The adipokine C1q TNF related protein 3 (CTRP3) is elevated in the breast milk of obese mothers
Source: PeerJ. 2018 Mar 5;6:e4472. doi: 10.7717/peerj.4472 (PMC5842766; doi:10.7717/peerj.4472)
Supplement: Supplemental Information 1 — The values for bioactive components measured in the collected breast milk for each subject are reported. Additional data include subject height, weight, age, and the number of days postpartum day that the sample was collected. [file peerj-06-4472-s001.xlsx]

## Sheet: Sheet1
		glucose (mg/dL)	Ghrelin (pg/mL)	Insulin (pg/mL)	Leptin (pg/mL)	Adiponectin (ng/mL)	IL-6 (pg/mL)	TNF-a (pg/mL)	CTRP3 (ng/mL)	Height (inches)	Weight (lbs)	BMI	age	lactation samples
LS-A01	Lean	18.1324	0.95	315.41	294.07	9.32746	1.35	0.55	3.9	65	135	22.4627	30	84
LS-A02	Lean	21.7779	0.95	64.05	119.65	13.4573	1.09	1.58	8.68	62	128	23.4089	27	96
LS-A03	Lean	23.0679	0.95	17.51	87.1	4.52418	0.83	2.48	4.06	62	135	24.6891	24	97
LS-A04	Lean	25.0869	0.95	2.3	36.91	10.2612	0.7	0.68	56.26	64	133	22.8269	35	45
LS-A05	Lean	23.0118	0.95	2.3	112.18	6.02983	9.67	2.48	6	71	155	21.6158	23	35
LS-A06	Lean	18.0482	0.95	53.89	425.31	8.18702	28.12	5.91	16.24	66	138	22.2713	35	33
LS-A07	Lean	21.9462	0.95	442.12	79.51	8.92293	2.27	2.86	4.36	66	126	20.3347	29	83
LS-A08	Lean	25.3954	0.95	98.43	65.5	12.3256	4.74	0.55	3.22	67	130	20.3587	31	102
LS-A09	Lean	17.9361	0.95	250.91	433.73	13.2305	8.12	13.68	3.84	66	137	22.11	27	56
LS-A10	Lean	24.3859	0.95	2.3	2.5	14.4384	0.7	0.55	10.94	65	147	24.4594	20	30
LS-A11	Lean	23.6007	0.95	2.3	2.5	9.35784	0.7	0.55	13.28	65	150	24.9586	26	98
LS-A13	Lean	17.0107	0.95	189.02	180.01	6.31749	4.09	2.61	4.44	67	150	23.4908	21	27
LS-A14	Lean	28.9007	0.95	396.46	521.58	17.6309	2.01	0.55	3.08	65	145	24.1266	30	42
LS-A15	Lean	24.3298	0.95	409.13	439.75	13.6016	0.96	1.84	34.92	70	140	20.0857	34	104
LS-A16	Lean	23.2642	63.67	85.45	754.98	7.31427	43.67	3.88	4.3	65	140	23.2947	32	35
LS-A17	Lean	18.9736	0.95	535.66	32.92	3.68825	2.53	1.58	5.6	63	118	20.9005	27	102
LS-A18	Lean	21.161	0.95	446.38	149.33	3.41801	12.91	5.91	5.92	67	125	19.5756	29	21
LS-A19	Lean	25.2271	36.18	96.46	326.63	1.27582	26.43	7.92	69.74	66	135	21.7872	26	49
LS-A20	Lean	25.9563	15.05	2.3	59.08	4.81768	4.61	2.35	3.76	64	120	20.5957	31	57
LS-A21	Lean	26.1245	15.05	108.66	59.08	1.65448	70.83	4.39	4.22	65	120	19.9669	42	47
LS-A22	Lean	25.3674	11.68	428.17	79.51	15.9735	1.48	1.33	38.3	66	128	20.6575	27	47
LS-A23	Lean	18.6091	15.05	181.19	132.05	5.92089	31.12	8.17	3.3	61	109	20.5931	30	33
LS-A24	Lean	18.4969	11.68	150.12	64.22	10.2815	2.53	0.81	3.46	65	150	24.9586	32	49
LS-B03	Obese	26.5451	0.95	274.72	1431.66	2.576	6.43	4.26	21.06	64	235	40.3333	31	98
LS-B04	Obese	23.18	0.95	656.01	1173.73	9.317	1.22	1.58	11.82	66	190	30.6635	21	84
LS-B05	Obese	22.3388	14.25	155.08	572.19	6.079	9.28	3.12	8.6	69	228	33.666	33	17
LS-B07	Obese	26.7975	5.02	634.91	764.71	18.29	3.18	3.25	35.54	62	185	33.8332	33	84
LS-B08	Obese	30.387	8.73	1199.28	628.93	14.34	0.96	1.07	2.62	66	220	35.5051	30	98
LS-B09	Obese	20.2916	7.61	725.26	3220.28	24.93	1.75	2.1	292.2	64	265	45.4822	31	104
LS-B10	Obese	27.3584	7.61	201.09	1252.66	1.275	7.73	2.61	81.82	66	198	31.9545	37	39
LS-B12	Obese	34.5093	57.87	959.13	1578.34	17.1924	1.48	1.84	36.22	64	180	30.8936	29	25
LS-B13	Obese	25.7039	0.95	129.49	605.98	6.99452	0.7	1.58	29.02	68	222	33.7513	31	54
LS-B14	Obese	7.95289	0.95	1397.01	463.8	6.23807	3.57	3.12	14.1	64	232	39.8184	32	21
LS-B15	Obese	16.7302	62.96	167.56	1035.74	12.1409	5.13	2.1	81.64	65	215	35.774	31	16
LS-B18	Obese	22.1144	5.02	523.39	243.28	13.1687	32.82	7.29	6.54	60	205	40.0319	26	63
LS-B19	Obese	15.8329	0.95	297.63	1011.02	11.8334	306.6	41.28	6.54	63	216	38.2585	23	18
LS-B20	Obese	16.4498	13.42	579.74	1184.98	4.46559	11.62	6.66	14.44	66	234	37.7645	26	16
LS-B16	Obese	17.6276	0.95	122.35	297.69	11.0765	0.7	0.81	5.607	67	280	43.8494	21	49

## Sheet: Sheet2
Adiponectin (ng/mL)	10.4	9.085	2.576	9.317	6.079	14.85	18.29	14.34	24.93	1.275	1.275	17.1924	6.99452	6.23807	12.1409	11.0765	13.1687	11.8334	4.46559	8.0362	19.6636	9.32746	13.4573	4.52418	10.2612	6.02983	8.18702	8.92293	12.3256	13.2305	14.4384	9.35784	19.1597	6.31749	17.6309	13.6016	7.31427	3.68825	3.41801	1.27582	4.81768	1.65448	15.9735	5.92089	10.2815
